# Supplementary material for: Vertebrate SLRP family evolution and the subfunctionalization of osteoglycin gene duplicates in teleost fish
Source: PubMed Central journal article supplement (PMC6293640; doi:10.1186/s12862-018-1310-2), 2018-12-13
Supplement: 12862_2018_1310_MOESM2_ESM.pdf [file 12862_2018_1310_MOESM2_ESM.pdf]

| Species                              | Osteoglycin 1 (OGN1) | Osteoglycin 2 (OGN2) |
|--------------------------------------|----------------------|----------------------|
| <i>Homo sapiens</i>                  | KJ891722             | -                    |
| <i>Gorilla gorilla gorilla</i>       | XM_004048267         | -                    |
| <i>Pongo abelii</i>                  | NM_001132012         | -                    |
| <i>Bos taurus</i>                    | BC102526             | -                    |
| <i>Equus caballus</i>                | XM_001917975         | -                    |
| <i>Ovis aries</i>                    | XM_004004076         | -                    |
| <i>Ceratotherium simum simum</i>     | XM_004442726         | -                    |
| <i>Tursiops truncatus</i>            | XM_004313593         | -                    |
| <i>Orcinus orca</i>                  | XM_004284119         | -                    |
| <i>Mus musculus</i>                  | NM_008760            | -                    |
| <i>Cricetulus griseus</i>            | XM_003505338         | -                    |
| <i>Rattus norvegicus</i>             | XM_006253696         | -                    |
| <i>Gallus gallus</i>                 | NM_204209            | -                    |
| <i>Taeniopygia guttata</i>           | XM_002193078         | -                    |
| <i>Ficedula albicollis</i>           | XM_005052906         | -                    |
| <i>Xenopus (Silurana) tropicalis</i> | ENSXETT00000045198   | -                    |
| <i>Pelodiscus sinensis</i>           | XM_006127563         | -                    |
| <i>Chrysemys picta bellii</i>        | XM_008165394         | -                    |
| <i>Latimeria Chalumnae</i>           | XM_005987054         | -                    |
| <i>Lepisosteus oculatus</i>          | XM_006631102         | -                    |
| <i>Gadus morhua</i>                  | ENSGMOT00000003141   | ENSGMOT00000004743   |
| <i>Astyanax mexicanus</i>            | ENSAMXT00000005237   | ENSAMXT00000013872   |
| <i>Danio rerio</i>                   | NM_001013570         | ENSDARG00000031489   |
| <i>Salmo salar</i>                   | BT056541             | BT048437             |
| <i>Oryzias latipes</i>               | XM_004086123         | -                    |
| <i>Dicentrarchus labrax</i>          | DLAgn_00097140       | DLAgn_00129310       |
| <i>Oreochromis niloticus</i>         | ENSONIT00000000620   | XM_003438862         |
| <i>Takifugu rubripes</i>             | XM_003973017         | XM_003963383         |
