# Supplementary material for: Vertebrate SLRP family evolution and the subfunctionalization of osteoglycin gene duplicates in teleost fish
Source: PubMed Central journal article supplement (PMC6293640; doi:10.1186/s12862-018-1310-2), 2018-12-13
Supplement: 12862_2018_1310_MOESM4_ESM.pdf [file 12862_2018_1310_MOESM4_ESM.pdf]

### Signal sequence

```

OGN1_S.aurata : ---MKSLIFTCMLVP-WLAAASARKSDQ-----DSQLIVGSLPGRELNGYFS---DP--LNSRR-----ARRAVS-LADEPDDS--PVSEGG-DASD LPTCLLCVCLIGSVY : 89
OGN1_O.niloticus : MLDMSKTLFFTCMLVP-WLVAASDRT-----KYL DG-----IKPKS-----EKRALP-PADEPDDN--PITAGA-DAAD LPTCLLCVCLIGSVY : 74
OGN1_G.morhua : ---MTTVVELCLLVP-WLATVSGNS-----LDQ-----KTQLI-LGRVPAGTELDYLES--RKTKLPTCLLCVCLIGSVY : 63
OGN1_D.erio : MRTRLRMLIAAVVLVS-MVLSASGAHYHT-----HRHHRLEDVALTEETD---VRAQRNKRSTNGDDDKNALM-LADAPDDSG-PLQFVG-DPSD LPTCLLCVCLIGSVY : 98
OGN2_S.aurata : MMQLRTLIFTYVILP-WILSSAAKD-----EFMEA-----RKPKEGVVT--YPTY---EEPATD--AAGDP--KADELPTCLLCVCLIGSVY : 72
OGN2_O.niloticus : MIPLRLIFTYVMLP-WIVSSAAKG-----EYMEA-----RTPKATVR--ASDYG-ILQDITD--GGVPS--KAEV LPTCLLCVCLIGSVY : 75
OGN2_G.morhua : --MHLEMLICVILIPSLVLCSPAKN-----GYIEA-----RAPKKDIVTIFEFPQD-LPAKPEAAGNMFSTKL-YNSVLPTCLLCVCLIGSVY : 80
OGN2_D.erio : MLDLYALTFTTLTHQ-WLLLSCKCS-----PVLS-----KIPKKVILS---QDYD-NPADKVE--IPGADP-KDDELPTCLMCVCLIGSVY : 74
OGN_L.oculatus : MSKLPKPLIFSLILVL-WVILAAVTAFTLDS-----EHHNNEKDFIRTPDD---FLTAL EAKQETIIDYEDLPPADTEPAENEVPLPTPKEAAELPTCLLCVCLIGSVY : 101
OGN_L.chalumnae : --MLHPVLLLFMLVA-WVKAQPVDKDYFTVENVNLDFDENETGLETHDVIYGDYEGKEEPSTRKKESTPDTFLELLRPPRSPTIEPERVLTQDVDLPTCLLCVCLIGSVY : 111
OGN_X.tropicalis : MQPLPVCCTLLLLLP-FILSAPSVPQQT-----ISHHEDYIVEGKLFQNLQ---KMAQTTERNGLTLLSKDRFK-RDQERAGSN-RTAAKV-EDADLPTCLLCVCLIGSVY : 100
OGN_G.gallus : MKTLQAAFLLVAFVP-LVKEAPPQQDSPKFYEYVDADFATGSLIQDDYE--ML---PKDTIKDGTNVSL--DTALR-LQADDSSEL--SARPTK-DTN-LPTCLLCVCLIGSVY : 101
OGN_H.sapiens : MKTLQSTL LLLLVLP-LVKEAPPPTQDSRIYDYGTDNFEES-IFSQDYEDKYL---DGKNIKEKETVIIPNEKSLQ-LQKDEAIT--PLPPKK--ENDELPTCLLCVCLIGSVY : 105
  
```

\* \* \* φ

#### L-motif 1

#### L-motif 2

#### L-motif 3

#### L-motif 4

#### L-motif 5

```

*
OGN1_S.aurata : CEEVSPDMTSVPTLPKETAYLYARFNKIKKIKTKDFAGILILKLRIDITGNLISEIEDGAFSKLLALESLSLAENRLVKLPMLPAKLTSEFNANNNF LKTRGVKANAFKKLTKLTHL : 204
OGN1_O.niloticus : CEEVSPDMTSIPTLPKETAYLYARFNKIKKIKTKDFAEIVTLKLRIDITGNLISEIEDGAFSKLTLLESLSLAENQLVKLPALPAKLTSEFNANNNK LKTRGVKANAFKKLTKLANL : 189
OGN1_G.morhua : CEEVSPDMTSVPALPKETAYLYARFNKIKKIRSKDFADILILKLRIDITGNLISEVEDGAFSKLPVLEELNLSNRLVKLPMLPAKLTSEFNANNNK LKTRGVKATAFKKLTRVNL : 178
OGN1_D.erio : CEEVDPDMTSVPTLPKETNYLYARFNKIKKIKTAKDFGDIVTLKLRIDITGNLISEIEDGAFANLTMLESLSLAENQLAKLPMLPAKLTSEFNANNNK LKTRGVKANAFKKLNLKHL : 213
OGN2_S.aurata : CEEVSPBMSAVPALPKETAYLYARFNKIKKIRNSDFADMAPLRRIDISGNLISEIEDGAFSKLPDLEELILAENKLRRLPMPETKLVTFENANFNK LKTRGVKATAFKKLTRSYL : 187
OGN2_O.niloticus : CEEVSPDMTSVPTLPKETAYLYARFNKIKKIHREDFADTALRRIDISGNLISEIEDGFSFKLPNLEELKLAENRLTKLPMLPSKLVTFENANFNK LKTRGVKANAFKKLTRAYL : 190
OGN2_G.morhua : CEEVFPQMTAIPALPRETTYLYARFNKINKIKNKDFADMGALKRIDITGNLISEIEDGAFSKLTNLEELFLAENRLTKLPMLPSKLTTLNANFNK LKTRGVKATAFKKLTRPEAF : 195
OGN2_D.erio : CEEVSPDMTTPALPQETAYLYARFNKIKKIKTKDFANIAILKLRIDISGNLISEIEDGAFSKLHLEELTLAENKLVKLPMLPANLLSLDYNHNK LKTRGVKANAFKKLTKL : 189
OGN_L.oculatus : CEEVVPVITAVPALPKETAYLYARFNKIKKIAQKDFSEIPILRRIDITGNLISEIEDGAFSKLPQLEELSLAENRLVKLPMLPPTKLTLEFNANNNK LKTRGVKANAFKKLTVN : 216
OGN_L.chalumnae : CEET--TIDSI PALPQETAYLYARFNKIKKIKTKDFADIPILKVIDITGNLISEIEDGAFSKLLLEALLAENRLTRIPALPPLKQLFENANNNK LKTRGVKANAFKKLNN : 224
OGN_X.tropicalis : CEET--ETEEVPLPKETAYLYARFNKIKKIKTAKDFSEFPILRRIDITGNLISEIEDKAFDALPPLLEQLAENKLRIPALPPTKLTLEFNANNDN KIKSGIKANAFKKLTSAYL : 213
OGN_G.gallus : CEET--DIEAVPPLPKETAYLYARFNKIKKIAVSDFAIDITLRRIDEISGNLISEIEDGAFSKLLLEELSLAENRLVKLPMLPPLKLTLEFNANNNK LKTRGVKANAFKKLTVN : 214
OGN_H.sapiens : CEEV--DIEAVPPLPKESAYLYARFNKIKKIKTAKDFADIPNLRRLDITGNLISEIEDGTFSHLSLEELSLAENQLLKPVLPPKLTLEFNANKY NIKSRGIKANAFKKLNN : 218
  
```

#### L-motif 6

#### L-motif 7

\* φ

```

OGN1_S.aurata : YLADNQLFAVP-QIPDSVQILHLONNIITEVNVDTFCRSNDTYLRLPSLNEVRLDGNPVVLSKNPDSFTCMKVLPVGRYR- : 282
OGN1_O.niloticus : FLADNMLFAVP-YIPESVRLHLHLONNIITEVNVDTFCRSNDTYLRLPSLNEVRLDGNPVVLSKYBDSFTCMKVLPVGRYR- : 268
OGN1_G.morhua : FLADNQLFAVP-QIPESVRLHLHLONNIITEVNVDTFCRSNDTYLRLPSLNEVRLDGNPVVLSKYBDSFTICLRSPLGRYY- : 257
OGN1_D.erio : YLAHNELEAVP-LIPETVRLHLHLONNIISTVSTDFTCRSNDTYIRPNMNEIRMDGNPILNGQYNSFTICLQSLPIGRYQ- : 292
OGN2_S.aurata : YLGNNELTAVP-QLPESLNVVHLHNNKISTIDETFCKGNISYIRTNLYQVRLDGNPIQLSKHPNSFTICLETLPICGYN- : 266
OGN2_O.niloticus : YLGDNELTAVP-HLPESLYVHLHNNKISTIDETFCKGNISYIRTNMYEVRDGNPLKLSHHPNSFTICLQSLPIGWYK- : 269
OGN2_G.morhua : YLGNNKLEVIP-QLPESLQIVHLHNNKINTIDETFCKGNISYIRSTMEEVRLDGNPLVLAQHNSFTICLRNLPTGHYH- : 274
OGN2_D.erio : YLGDNLEFAIP-PLPESLRVHLHNNKISTIDETFCKGNISYIRHNMQEVRLDGNPITLAQHNSFTICLRALPTGHYK- : 268
OGN_L.oculatus : YLANNLEFAVPPHLPESLRVHLHLONNIITAIIDETFCKGNISYIRTNMDEIRLEGNPILGKYNSFTICLQSLPIGRYY- : 296
OGN_L.chalumnae : YLTHNVLEKVPPIPTLRLVHLHLONNIITSIIDETFCKANDISYIRDCMDEIRMEGNPILAKHPNSFTICLQSLPIGRYY- : 304
OGN_X.tropicalis : YLANNKLEVIP-QLPESLQIVHLHNNKISTIDETFCKGNISYIRSTMEEVRLDGNPILVLAQHNSFTICLRNLPTGHYK- : 294
OGN_G.gallus : YLGHNALESVPLNLPESLRVHLHLONNIITINDDTFCKSNISYIRTRMDEIRMEGNPILAKHVNAFSLRRLPVGTY- : 294
OGN_H.sapiens : YLDHNALESVPLNLPESLRVHLHLONNIITIASIIDETFCKANDISYIRDRIEIRLEGNPILGKYNSFTICLRRLPIGRYY- : 298
  
```
