# Supplementary material for: Vertebrate SLRP family evolution and the subfunctionalization of osteoglycin gene duplicates in teleost fish
Source: PubMed Central journal article supplement (PMC6293640; doi:10.1186/s12862-018-1310-2), 2018-12-13
Supplement: 12862_2018_1310_MOESM6_ESM.pdf [file 12862_2018_1310_MOESM6_ESM.pdf]

| SLRP class | Name                                | Gene symbol | Cystein motif | ML cluster |
|------------|-------------------------------------|-------------|---------------|------------|
| I          | Biglycan                            | BGN         | CX3CXCX6C     | 2          |
| I          | Decorin                             | DCN         | CX3CXCX6C     | 2          |
| I          | Asporin                             | ASPN        | CX3CXCX6C     | 2          |
| I          | Extracellular matrix protein 2      | ECM2        | CX2CXCX6C     | 1          |
| i          | Extracellular matrix protein 2-like | ECM2L       | CX2CXCX6C     | 1          |
| I          | Extracellular matrix protein X      | ECMX        | CX3CXCX6C     | 1          |
| I          | Extracellular matrix protein X-like | ECMXL       | -             | 1          |
| II         | Fibromodulin                        | FMOD        | CX3CXCX9C     | 2          |
| II         | Lumican                             | LUM         | CX3CXCX9C     | 3          |
| II         | Lumican-like                        | LUML        | CX3CXCX9C     | 3          |
| II         | Prolargin                           | PRELP       | CX3CXCX9C     | 3          |
| II         | Keratocan                           | KERA        | CX3CXCX9C     | 3          |
| II         | Osteoadherin                        | OMD         | CX3CXCX9C     | 3          |
| III        | Osteoglycin                         | OGN         | CX2CXCX6C     | 4          |
| III        | Epiphycan                           | EPYC        | CX2CXCX6C     | 4          |
| III        | Opticin                             | OPTC        | CX2CXCX6C     | 4          |
| IV         | Chondroadherin                      | CHAD        | CX3CXCX8C     | 6          |
| IV         | Chondroadherin-like                 | CHADL       | CX3CXCX8C     | 6          |
| IV         | Nyctalopin                          | NYX         | CX3CXCX5C     | 6          |
| IV         | Tsukushi                            | TSK         | CX3CXCX17C    | 5          |
| V          | Podocan                             | PODN        | CX3CXCX7C     | 5          |
| -          | Nephrocan                           | NPC         | CX3CXCX7C     | 2          |
