# Supplementary material for: Vertebrate SLRP family evolution and the subfunctionalization of osteoglycin gene duplicates in teleost fish
Source: PubMed Central journal article supplement (PMC6293640; doi:10.1186/s12862-018-1310-2), 2018-12-13
Supplement: 12862_2018_1310_MOESM7_ESM.pdf [file 12862_2018_1310_MOESM7_ESM.pdf]

| Branch <sup>a</sup>        | Corrected p-value <sup>b</sup> | $\omega^{+c}$ | Pr [ $\omega=\omega^{+}$ ] <sup>d</sup> |
|----------------------------|--------------------------------|---------------|-----------------------------------------|
| <i>D.labrax ogn1</i>       | <0.0001                        | 74.07         | 0.16                                    |
| <i>T.rubripes ogn1</i>     | 0.000                          | 16.40         | 0.15                                    |
| <i>O.latipes ogn1</i>      | 0.001                          | 11.39         | 0.20                                    |
| <i>O.niloticus ogn1</i>    | 0.003                          | 21.47         | 0.07                                    |
| Node 15 <sup>e</sup>       | 0.011                          | 863.89        | 0.04                                    |
| <i>C. picta belii ogn1</i> | 0.020                          | 2785.35       | 0.02                                    |
| <i>A.mexicanus ogn1</i>    | 0.030                          | 654.36        | 0.09                                    |
| <i>L.chalumnae ogn1</i>    | 0.043                          | 12.91         | 0.19                                    |

<sup>a</sup> Branch under episodic diversifying selection at  $p \leq 0.05$ .

<sup>b</sup> The p-value for episodic selection at this branch corrected for multiple testing using the Holm-Bonferroni method

<sup>c</sup> The  $\omega$  value inferred for positively selected sites long this branch.

<sup>d</sup> The proportion of sites inferred to be evolving at  $\omega^{+}$  along this branch.

<sup>e</sup> Node 15 refers to the separation of *Takifugu rubripes* OGN1 with *Dicentrarchus labrax* and *Sparus aurata* OGN1.
