# Supplementary material for: Vertebrate SLRP family evolution and the subfunctionalization of osteoglycin gene duplicates in teleost fish
Source: PubMed Central journal article supplement (PMC6293640; doi:10.1186/s12862-018-1310-2), 2018-12-13
Supplement: 12862_2018_1310_MOESM8_ESM.pdf [file 12862_2018_1310_MOESM8_ESM.pdf]

| Species                       | Tissue                     | Accession number | Identity        | Reference                                                                                                                                                                                                          |  |
|-------------------------------|----------------------------|------------------|-----------------|--------------------------------------------------------------------------------------------------------------------------------------------------------------------------------------------------------------------|--|
| <i>Carassius auratus</i>      | Olfactory epithelium       | AM928511         | 77% <i>ogn1</i> | Krasnov et al., 2012 doi:<br>10.1186/1471-2164-13-130<br><br>Kessels et al., 2014,<br>PubMed: 24608635<br>He et al., 2014, doi:<br>10.1530/JOE-13-0488<br>Ibarz et al., 2013,<br>doi:10.1007/s10126-013-<br>9513-4 |  |
| <i>Danio rerio</i>            | Myoblast                   | CT620959         | 75% <i>ogn1</i> |                                                                                                                                                                                                                    |  |
| <i>Gasterosteus aculeatus</i> | Eyes                       | DN691791         | 67% <i>ogn1</i> |                                                                                                                                                                                                                    |  |
| <i>Salmo salar</i>            | Fast muscle                | DY467584         | 81% <i>ogn1</i> |                                                                                                                                                                                                                    |  |
| <i>Salmo salar</i>            | Thyroid                    | EG868446         | 63% <i>ogn1</i> |                                                                                                                                                                                                                    |  |
| <i>Salmo salar</i>            | Skin                       | -                | -               |                                                                                                                                                                                                                    |  |
| <i>Danio rerio</i>            | Fin                        | EV761307         | 77% <i>ogn1</i> |                                                                                                                                                                                                                    |  |
| <i>Danio rerio</i>            | Postcranial axial skeleton | -                | -               |                                                                                                                                                                                                                    |  |
| <i>Danio rerio</i>            | Pituitary                  | -                | -               |                                                                                                                                                                                                                    |  |
| <i>Sparus aurata</i>          | Skin/scales                | -                | -               |                                                                                                                                                                                                                    |  |
| <i>Gadus morhua</i>           | Digestive tissue           | FF416230         | 71% <i>ogn1</i> |                                                                                                                                                                                                                    |  |
| <i>Oreochromis niloticus</i>  | Skin                       | GR683533         | 82% <i>ogn1</i> |                                                                                                                                                                                                                    |  |
| <i>Haplochromis sp.</i>       | Jaw                        | BJ695864         | 75% <i>ogn2</i> |                                                                                                                                                                                                                    |  |
| <i>Salmo salar</i>            | Thymus                     | EG772938         | 72% <i>ogn2</i> |                                                                                                                                                                                                                    |  |
| <i>Salmo salar</i>            | Thyroid                    | EG869322         | 70% <i>ogn2</i> |                                                                                                                                                                                                                    |  |
| <i>Salmo salar</i>            | Head kidney                | EG900788         | 70% <i>ogn2</i> |                                                                                                                                                                                                                    |  |
| <i>Dicentrarchus labrax</i>   | Spleen                     | FM024708         | 67% <i>ogn2</i> |                                                                                                                                                                                                                    |  |
| <i>Oreochromis niloticus</i>  | Skeletal muscle            | GR688606         | 83% <i>ogn2</i> |                                                                                                                                                                                                                    |  |
